# Supplementary material for: Pathogen-driven degradation of endogenous and therapeutic antibodies during streptococcal infections
Source: PubMed Central journal article supplement (PMC10593946; doi:10.1038/s41467-023-42572-0), 2023-10-23
Supplement: 41467_2023_42572_MOESM1_ESM.pdf [file 41467_2023_42572_MOESM1_ESM.pdf]

EndoS cleavage products (in-vitro)

| Peptide           | Glycan                    | PSM | Protein | Species |
|-------------------|---------------------------|-----|---------|---------|
| [R].EEQYNSTYR.[V] | 1xHexNAc(1)               | 37  | IgG1    | Human   |
| [R].EEQYNSTYR.[V] | 1xHexNAc(1)Fuc(1)         | 71  | IgG1    | Human   |
| [R].EEQFNSTFR.[V] | 1xHexNAc(1)               | 34  | IgG2    | Human   |
| [R].EEQFNSTFR.[V] | 1xHexNAc(1)Fuc(1)         | 77  | IgG2    | Human   |
| [R].EEQFNSTYR.[V] | 1xHexNAc(1)               | 12  | IgG3    | Human   |
| [R].EEQFNSTYR.[V] | 1xHexNAc(1)Fuc(1)         | 39  | IgG3    | Human   |
| [R].EEQFNSTFR.[V] | 1xHexNAc(1)               | 5   | IgG4    | Human   |
| [R].EEQYNSTYR.[V] | 1xHexNAc(2)Hex(3)         | 3   | IgG1    | Human   |
| [R].EEQYNSTYR.[V] | 1xHexNAc(2)Hex(4)         | 4   | IgG1    | Human   |
| [R].EEQYNSTYR.[V] | 1xHexNAc(2)Hex(5)         | 6   | IgG1    | Human   |
| [R].EEQYNSTYR.[V] | 1xHexNAc(2)Hex(6)         | 6   | IgG1    | Human   |
| [R].EEQYNSTYR.[V] | 1xHexNAc(4)Hex(3)         | 3   | IgG1    | Human   |
| [R].EEQYNSTYR.[V] | 1xHexNAc(4)Hex(3)Fuc(1)   | 9   | IgG1    | Human   |
| [R].EEQYNSTYR.[V] | 1xHexNAc(4)Hex(4)Fuc(1)   | 9   | IgG1    | Human   |
| [R].EEQFNSTFR.[V] | 1xHexNAc(2)Hex(5)         | 3   | IgG2    | Human   |
| [R].EEQFNSTFR.[V] | 1xHexNAc(2)Hex(6)         | 3   | IgG2    | Human   |
| [R].EEQFNSTYR.[V] | 1xHexNAc(2)Hex(5)         | 2   | IgG3    | Human   |
| [R].EEQFNSTYR.[V] | 1xHexNAc(3)Hex(4)         | 5   | IgG3    | Human   |
| [R].EEQFNSTYR.[V] | 1xHexNAc(4)Hex(4)Fuc(1)   | 2   | IgG3    | Human   |
| [R].EEQFNSTYR.[V] | 1xHexNAc(4)Hex(5)Fuc(1)   | 3   | IgG3    | Human   |
| [R].EEQFNSTYR.[V] | 1xHexNAc(4)Hex(5)NeuAc(1) | 9   | IgG3    | Human   |
| [R].EEQFNSTYR.[V] | 1xHexNAc(5)Hex(4)         | 2   | IgG3    | Human   |
| [R].EEQFNSTYR.[V] | 1xHexNAc(5)Hex(5)         | 3   | IgG3    | Human   |
| [R].EEQFNSTYR.[V] | 1xHexNAc(5)Hex(5)NeuAc(1) | 5   | IgG3    | Human   |
| [R].EEQINSTFR.[S] | 1xHexNAc(1)               | 29  | IgG1    | Mouse   |
| [R].EEQINSTFR.[S] | 1xHexNAc(1)Fuc(1)         | 60  | IgG1    | Mouse   |
| [R].EDYNSTIR.[V]  | 1xHexNAc(1)               | 64  | IgG2B   | Mouse   |
| [R].EDYNSTIR.[V]  | 1xHexNAc(1)Fuc(1)         | 99  | IgG2B   | Mouse   |
| [R].EAQYNSTFR.[V] | 1xHexNAc(1)               | 8   | IgG3    | Mouse   |
| [R].EAQYNSTFR.[V] | 1xHexNAc(1)Fuc(1)         | 25  | IgG3    | Mouse   |
| [R].EEQINSTFR.[S] | 1xHexNAc(2)Hex(5)         | 3   | IgG1    | Mouse   |
| [R].EEQINSTFR.[S] | 1xHexNAc(2)Hex(6)         | 4   | IgG1    | Mouse   |
| [R].EEQINSTFR.[S] | 1xHexNAc(4)Hex(3)Fuc(1)   | 2   | IgG1    | Mouse   |
| [R].EEQINSTFR.[S] | 1xHexNAc(4)Hex(4)Fuc(1)   | 3   | IgG1    | Mouse   |
| [R].EEQINSTFR.[S] | 1xHexNAc(4)Hex(5)Fuc(1)   | 2   | IgG1    | Mouse   |
| [R].EDYNSTIR.[V]  | 1xHexNAc(4)Hex(5)Fuc(1)   | 4   | IgG2B   | Mouse   |
| [R].EDYNSTIR.[V]  | 1xHexNAc(5)Hex(5)NeuAc(1) | 2   | IgG2B   | Mouse   |

Red: Truncated structures  
Green: High-mannose structures

Human: ~79%

Mouse: ~93%

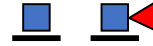

Truncated glycans

Human: ~8%

Mouse: ~3%

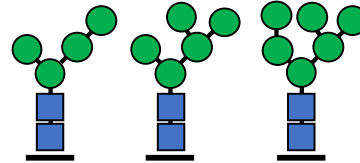

High-mannose glycans

Supplemental Fig. 1. Glycoproteomics characterization of IgG products generated after exhaustive overnight incubation of human and murine plasma with recombinant EndoS. PSM: peptide spectrum matches. Hex: Hexose, HexNAc: N-acetylhexosamine, Fuc: fucose, NeuAc: N-acetylneuraminic acid, NeuGc: N-glycolylneuraminic acid.

Glycoform distribution in infected murine plasma after IgG depletion

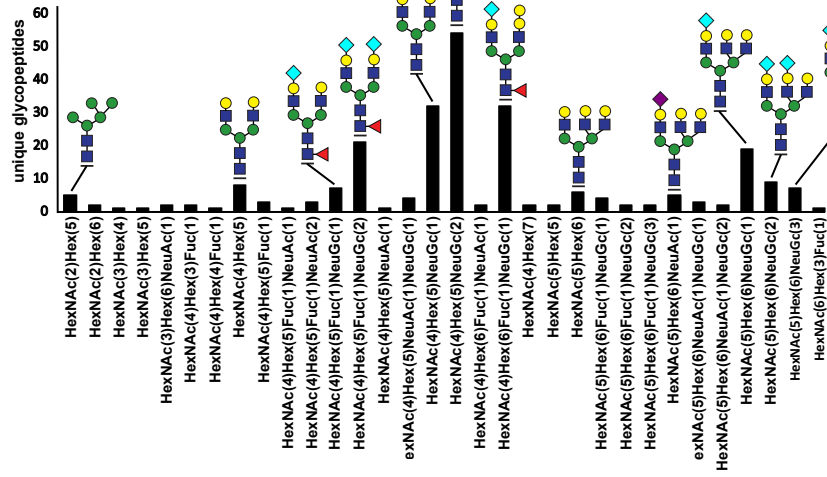

Supplemental Fig. 2. Glycoform distribution of glycopeptides derived from non-IgG glycoproteins in the plasma of GAS-infected mice at 36 p.i. Hex: Hexose, HexNAc: N-acetylglucosamine, Fuc: fucose, NeuAc: N-acetylneuraminic acid, NeuGc: N-glycolylneuraminic acid.

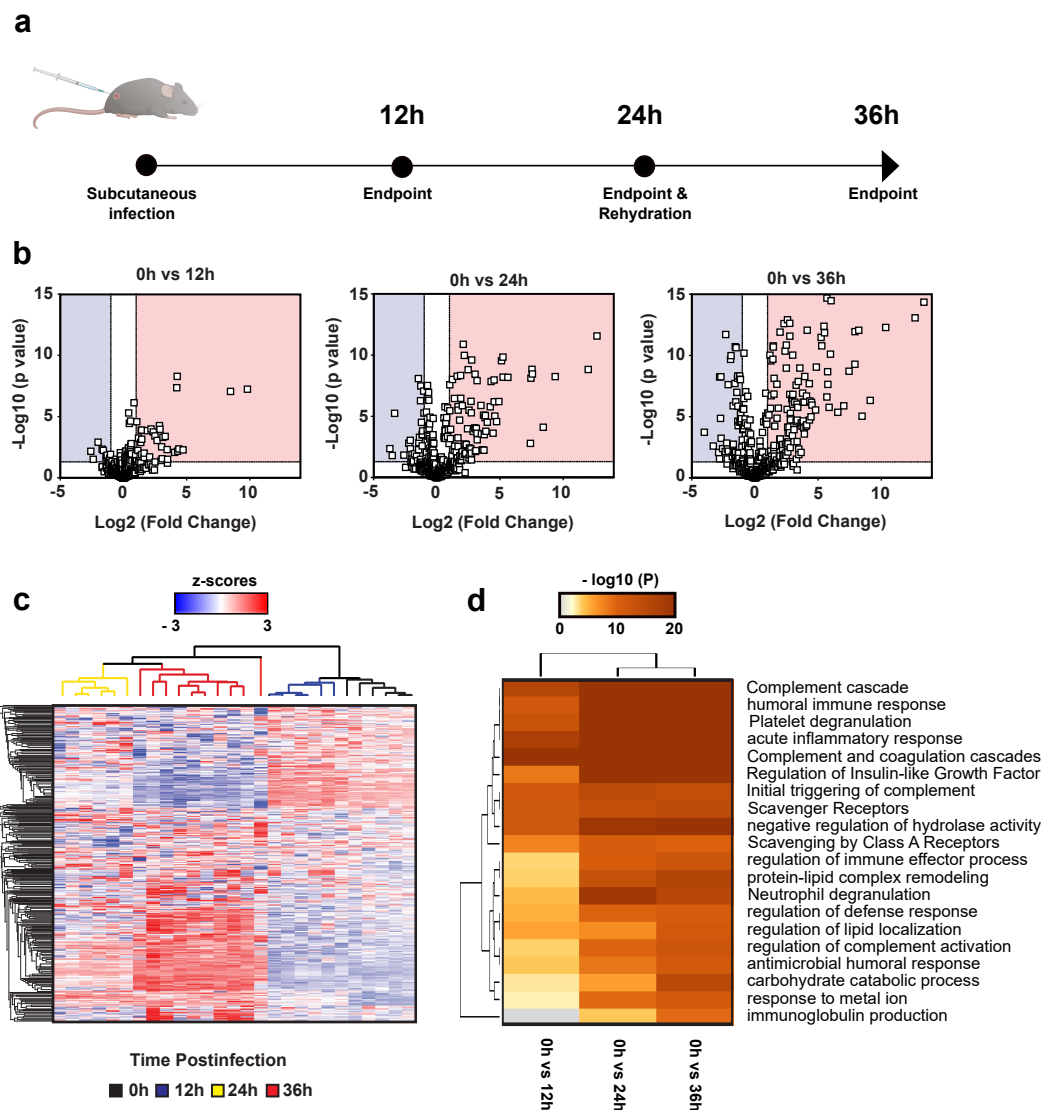

Supplemental Fig. 3. Time-resolved plasma proteome changes associated with the transition from local to systemic GAS infection. a, Schematic representation of the experimental design of the course of infection. b, Volcano plots displaying differentially changed plasma protein abundances at each time point compared to uninfected controls. c, Hierarchical clustering of plasma proteins differentially regulated over the course of the infection. d, Metascape functional enrichment analysis of c. Created with BioRender.com

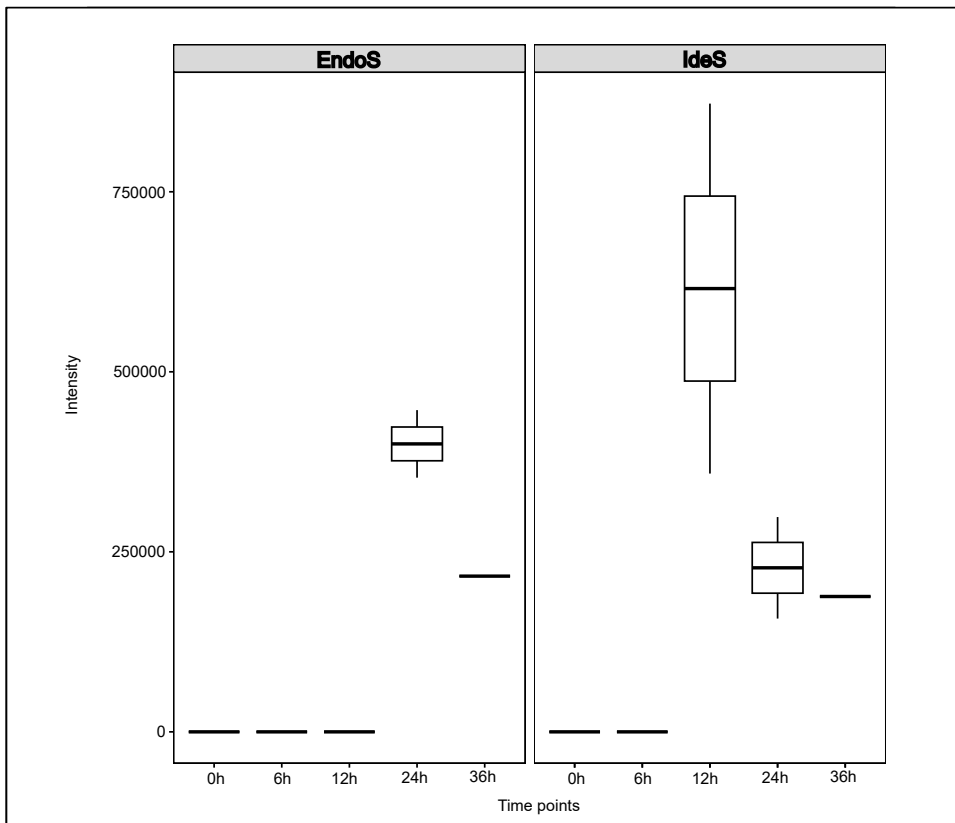

Supplemental Fig. 4. IdeS and EndoS are expressed in infected skin at the protein level. Mass spectrometry analysis of the levels of bacterial EndoS and IdeS over time in mouse skin samples from the inoculation site.

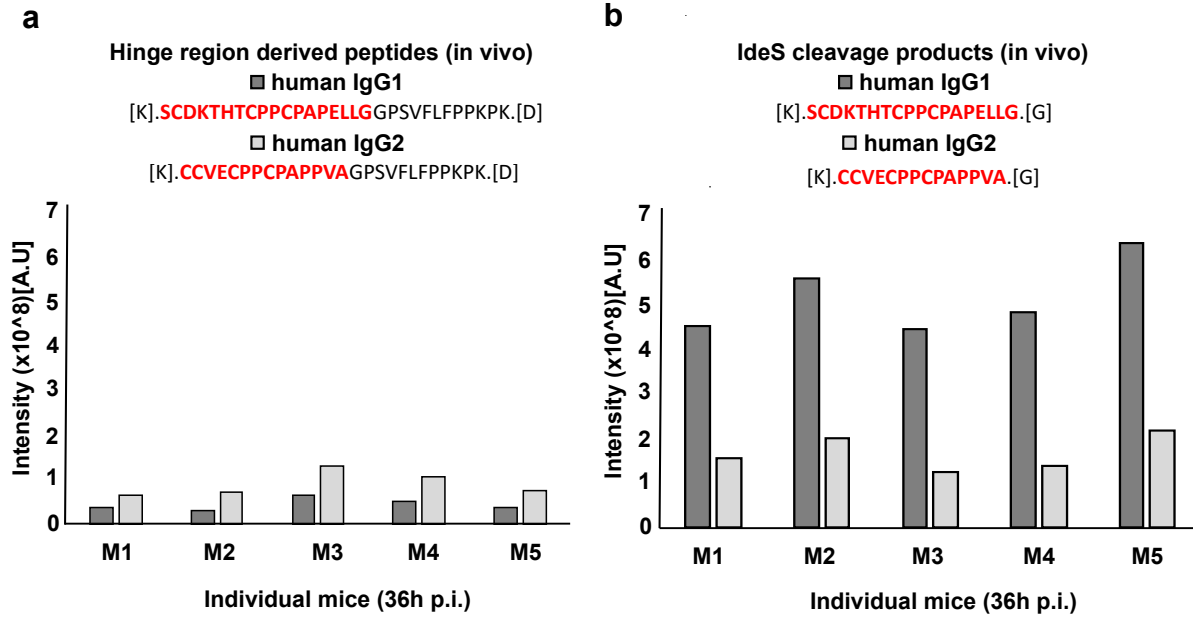

Supplemental Fig. 5. IdeS activity contributes to IVIG degradation in vivo. Mass spectrometric intensity of tryptic peptides derived from a, intact and b, IdeS-cleaved human IgG hinge regions in murine plasma upon GAS infection.

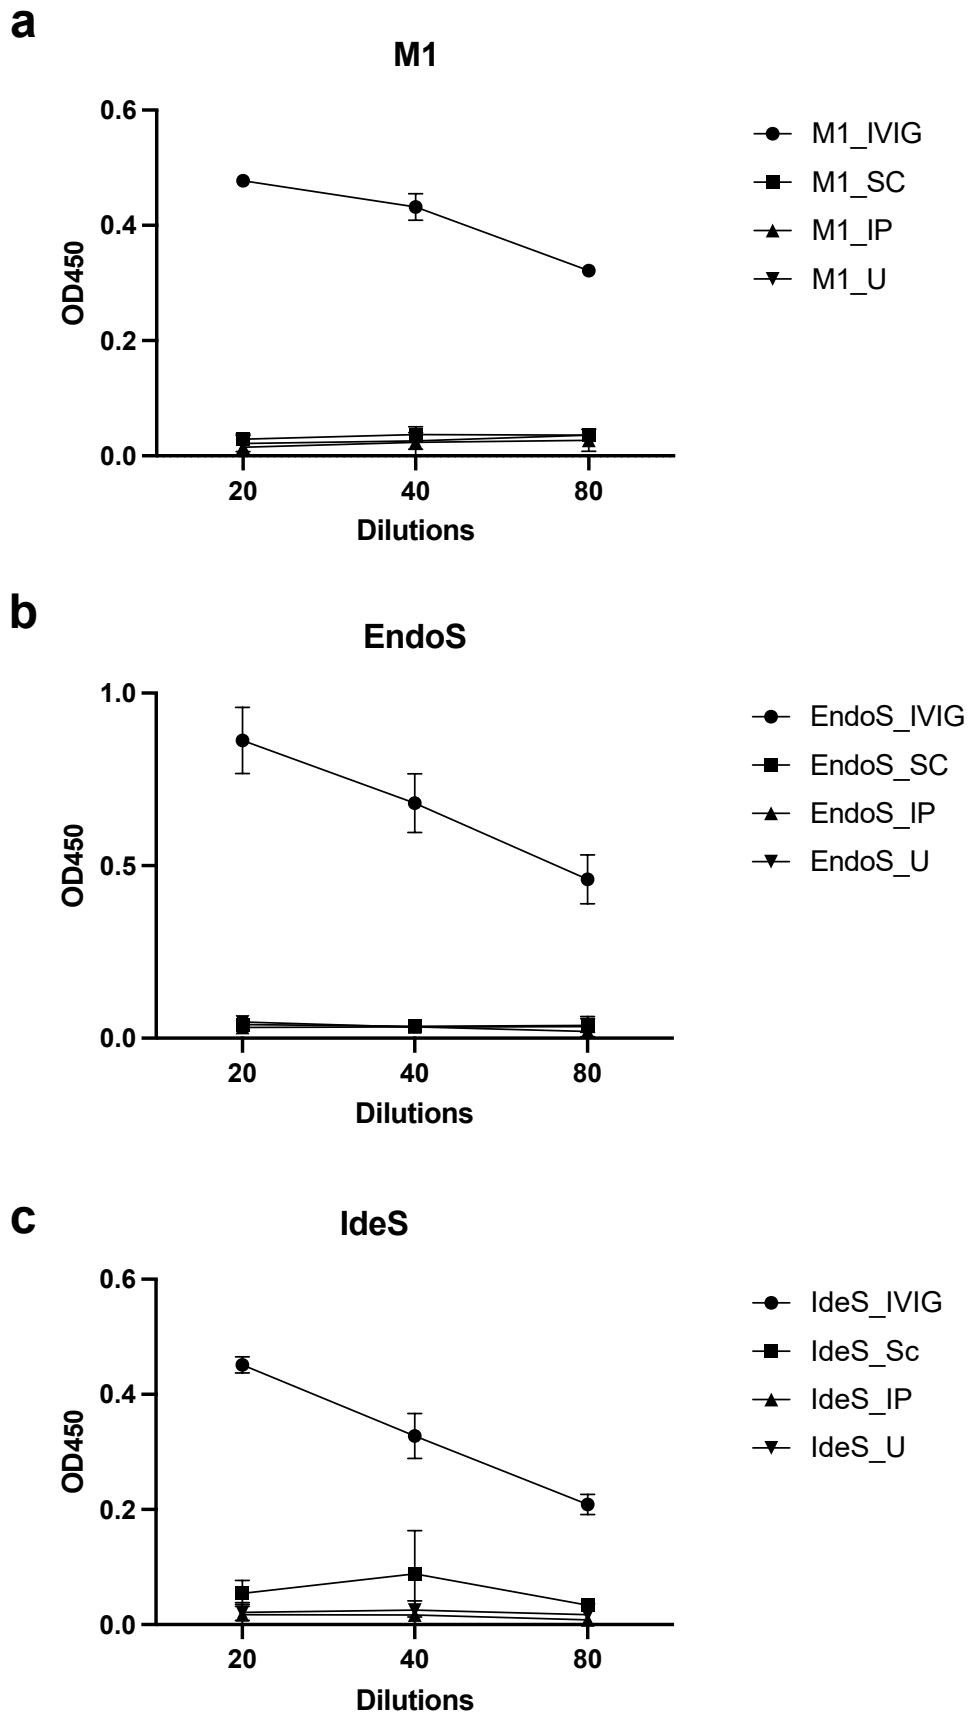

Supplemental Fig. 6. Antibody titers against a, M1, b, EndoS, and c, IdeS in IVIG and infected mouse plasma at 24 h post infection after intraperitoneal (IP) or subcutaneous (Sc) bacterial inoculation. Samples were run in triplicates, and the IgG titers for three individual mice for each infection condition are shown.

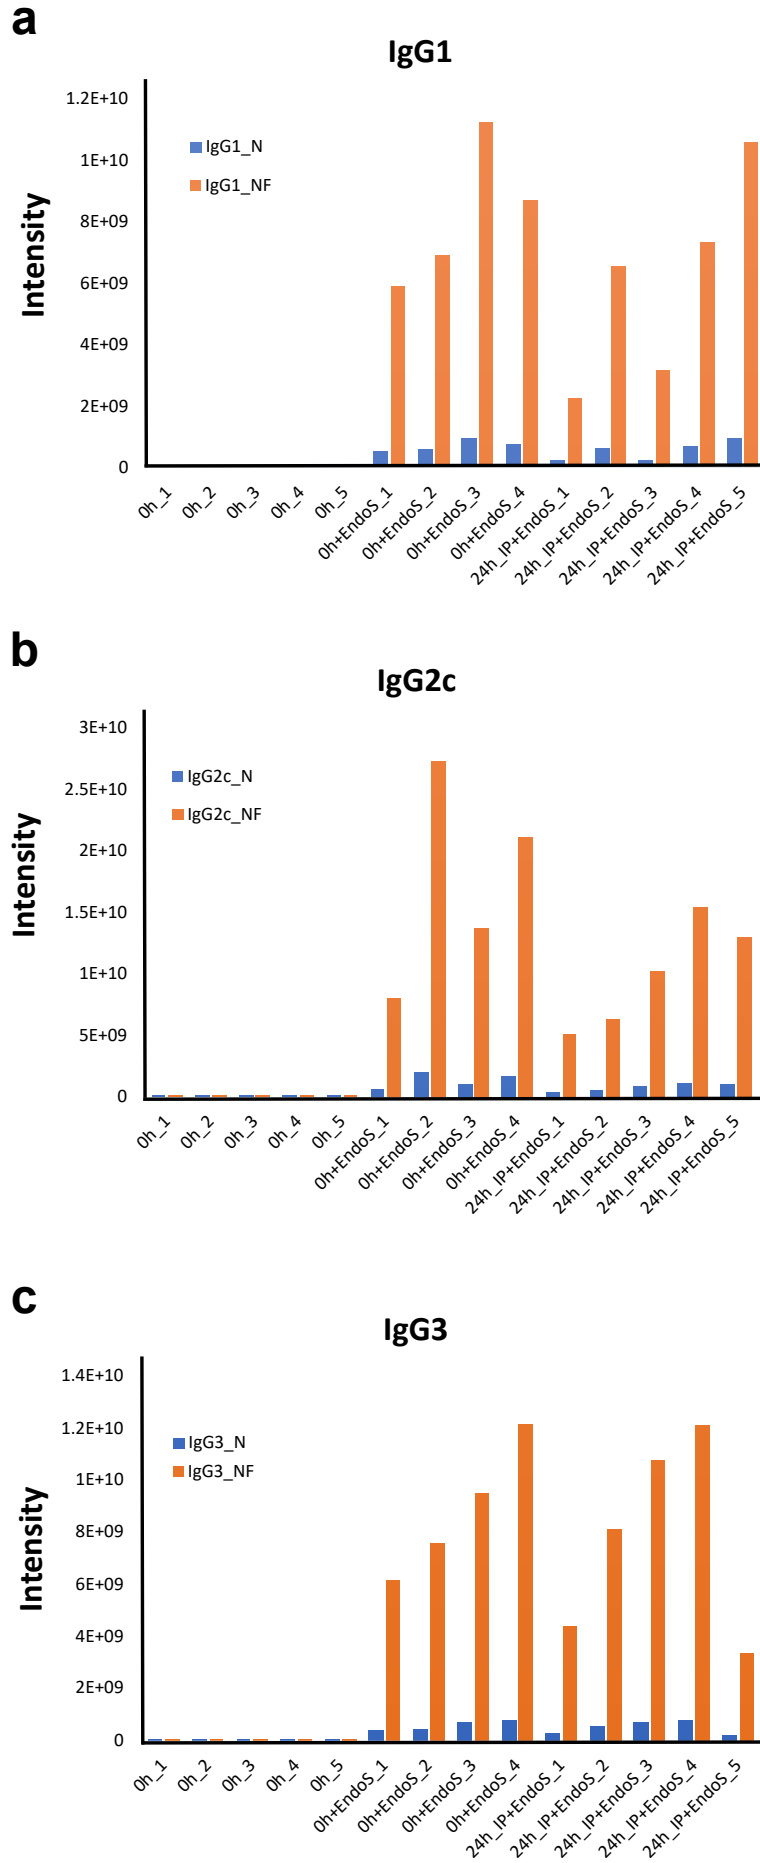

Supplemental Fig. 7. Mass spectrometric analysis of EndoS-truncated IgG glycopeptides with a single N-acetylhexosamine (N) or a single N-acetylhexosamine plus fucose (NF) derived from murine a, IgG1, b, IgG2c, and c, IgG3. Plasma from intraperitoneally infected mice at 0h and 24h post infection was incubated with or without recombinant EndoS, and the degradation products were measured by glycoproteomics. The signal for individual mice is shown in the figure. Each value of the X-axis is labeled according to the experimental conditions, 0h: uninfected, 0h+EndoS: uninfected plasma treated with EndoS, 24h\_IP+EndoS: plasma from intraperitoneally (IP) infected mice at 24h post infection and treated with EndoS. The Y-axis denote the normalized peptide intensity.

Supplemental Table 1. Glycoproteomics identifications in infected murine plasma after IgG depletion

| Proteins                                             | Unique glycopeptides | Glycopeptide counts |
|------------------------------------------------------|----------------------|---------------------|
| Afamin                                               | 3                    | 76                  |
| Alpha-1-acid glycoprotein 1                          | 9                    | 679                 |
| Alpha-1-acid glycoprotein 2                          | 6                    | 269                 |
| Alpha-1-antitrypsin 1-3                              | 3                    | 165                 |
| Alpha-2-macroglobulin-P                              | 2                    | 23                  |
| Angiotensinogen                                      | 1                    | 5                   |
| Antithrombin-III                                     | 4                    | 44                  |
| Apolipoprotein C-IV                                  | 2                    | 8                   |
| Beta-2-glycoprotein 1                                | 2                    | 39                  |
| Carboxylesterase 1C                                  | 4                    | 212                 |
| Carboxypeptidase B2                                  | 3                    | 323                 |
| Carboxypeptidase N subunit 2                         | 1                    | 16                  |
| Ceruloplasmin                                        | 4                    | 35                  |
| Coagulation factor V                                 | 1                    | 2                   |
| Complement C4-B                                      | 1                    | 2                   |
| Complement factor H                                  | 4                    | 69                  |
| Complement factor I                                  | 2                    | 27                  |
| Corticosteroid-binding globulin                      | 5                    | 43                  |
| Epidermal growth factor receptor                     | 1                    | 7                   |
| Fetuin-B                                             | 1                    | 71                  |
| Fibrinogen beta chain                                | 15                   | 895                 |
| Fibronectin                                          | 2                    | 84                  |
| H-2 class I histocompatibility antigen               | 1                    | 103                 |
| Haptoglobin                                          | 31                   | 1386                |
| Hemopexin                                            | 6                    | 246                 |
| Immunoglobulin heavy constant mu                     | 6                    | 119                 |
| Inter alpha-trypsin inhibitor, heavy chain 4         | 11                   | 406                 |
| Inter-alpha-trypsin inhibitor heavy chain H1         | 2                    | 7                   |
| Isoform 2 of Leukemia inhibitory factor receptor     | 4                    | 81                  |
| Isoform D of Proteoglycan 4                          | 1                    | 2                   |
| Kininogen-1                                          | 6                    | 567                 |
| Lipopolysaccharide-binding protein                   | 1                    | 2                   |
| Monocyte differentiation antigen CD14                | 2                    | 19                  |
| Murinoglobulin-1                                     | 15                   | 377                 |
| Phosphatidylcholine-sterol acyltransferase           | 1                    | 7                   |
| Phosphatidylinositol-glycan-specific phospholipase D | 5                    | 46                  |
| Plasma kallikrein                                    | 3                    | 18                  |
| Pregnancy zone protein                               | 40                   | 2901                |
| Protein Z-dependent protease inhibitor               | 1                    | 5                   |
| Prothrombin                                          | 4                    | 145                 |
| Selenoprotein P                                      | 1                    | 4                   |
| Serine protease inhibitor A3F                        | 3                    | 68                  |
| Serine protease inhibitor A3K                        | 14                   | 754                 |
| Serine protease inhibitor A3M                        | 1                    | 4                   |
| Serum amyloid P-component                            | 2                    | 41                  |
| Serum paraoxonase/arylesterase 1                     | 2                    | 32                  |
| Transthyretin                                        | 2                    | 68                  |
| Vitronectin                                          | 5                    | 55                  |

Glycoproteins: 48, unique glycopeptides: 246



**Supplemental Table 2. IdeS cleavage products**

| IdeS treatment | Identified Peptides                      | Protein    | Species |
|----------------|------------------------------------------|------------|---------|
| Untreated      | APELL <b>GG</b> PSVFLFPPKPK              | IgG1, IgG3 | Human   |
| Untreated      | CPAPELL <b>GG</b> PSVFLFPPKPK            | IgG1, IgG3 | Human   |
| Untreated      | ELL <b>GG</b> PSVFLFPPKPK                | IgG1, IgG3 | Human   |
| Untreated      | PAPELL <b>GG</b> PSVFLFPPKPK             | IgG1, IgG3 | Human   |
| Untreated      | PELL <b>GG</b> PSVFLFPPKPK               | IgG1, IgG3 | Human   |
| Untreated      | CCVECPCPAPPV <b>AG</b> PSVFLFPPK         | IgG2       | Human   |
| Untreated      | CCVECPCPAPPV <b>AG</b> PSVFLFPPKPK       | IgG2       | Human   |
| Untreated      | KCCVECPCPAPPV <b>AG</b> PSVFLFPPKPK      | IgG2       | Human   |
| Untreated      | YGPPCPCPAPEFL <b>GG</b> PSVF             | IgG4       | Human   |
| Untreated      | YGPPCPCPAPEFL <b>GG</b> PSVFLFPPK        | IgG4       | Human   |
| Untreated      | YGPPCPCPAPEFL <b>GG</b> PSVFLFPPKPK      | IgG4       | Human   |
| Untreated      | DCGCKPCICTVPE <b>V</b> SSVFIFPPKPK       | IgG1       | Mouse   |
| Untreated      | CPAPNLE <b>GG</b> PSVF                   | IgG2b      | Mouse   |
| Untreated      | CPAPNLE <b>GG</b> PSVFIFPPNIK            | IgG2b      | Mouse   |
| Untreated      | CPAPNLE <b>GG</b> PSVFIFPPNIKDVLMISLTPK  | IgG2b      | Mouse   |
| Untreated      | IPKPSTPPGSSCPPGNIL <b>GG</b> PSVFIFPPKPK | IgG3       | Mouse   |
| Untreated      | PSTPPGSSCPPGNIL <b>GG</b> PSVFIFPPKPK    | IgG3       | Mouse   |
| Treated        | [K].SCDKTHTCPPCPAPELL <b>G.[G]</b>       | IgG1*      | Human   |
| Treated        | [K].THTCPPCPAPELL <b>G.[G]</b>           | IgG1*      | Human   |
| Treated        | [R].KCCVECPCPAPPV <b>A.[G]</b>           | IgG2*      | Human   |
| Treated        | <b>[L].GG</b> PSVFIFPPKPK.[D]            | IgG3*      | Mouse   |
| Treated        | <b>[G].G</b> PSVFIFPPKPK.[D]             | IgG3*      | Mouse   |
| Treated        | DCGCKPCICTVPE <b>V</b> SSVFIFPPKPK       | IgG1       | Mouse   |
| Treated        | CPAPNLE <b>GG</b> PSVF                   | IgG2b      | Mouse   |
| Treated        | CPAPNLE <b>GG</b> PSVFIFPPNIK            | IgG2b      | Mouse   |
| Treated        | CPAPNLE <b>GG</b> PSVFIFPPNIKDVLMISLTPK  | IgG2b      | Mouse   |
| Treated        | IPKPSTPPGSSCPPGNIL <b>GG</b> PSVFIFPPKPK | IgG3       | Mouse   |
| Treated        | PSTPPGSSCPPGNIL <b>GG</b> PSVFIFPPKPK    | IgG3       | Mouse   |
